# Supplementary material
Source: Springer Nature journal article supplement (https://www.springerprofessional.de/resource/supplementary/13638_2011_21_MOESM5_ESM.pdf/11897282)
Supplement: MOESM5 [file 11897282]

---

*Algorithm 1: Whenever the sender receives three dupacks*

---

- (1) *If (three dupacks) {*
  - (2)     *If ( $Ql > Th-Val$ ) {*
  - (3)         *Report congestion*
  - (4)     *} else {*
  - (5)         *Report non-congestion*
  - (6)     *}*
  - (7) *}*
-
